# Supplementary material for: Naphthylimide-based mitochondrial immobilized probes for polarity-specific imaging of mitochondrial autophagy in cells and mouse cardiac tissue
Source: Royal Society of Chemistry journal article supplement (doi:10.1039/d5tb02337h), 2026-01-01
Supplement: d5tb02337h1.pdf [file d5tb02337h1.pdf]

*Supporting Information for*

Naphthylimide-based mitochondrial immobilized probes  
for polarity-specific imaging of mitochondrial autophagy  
in cells and mouse cardiac tissue

Yukun Zhang <sup>a</sup>, Lie Li <sup>b</sup>, Ruiyuan Liu <sup>b\*</sup>, Jinqing Qu <sup>a\*</sup>

<sup>a</sup> School of Chemistry and Chemical Engineering, South China University of Technology,  
Guangzhou 510640, P.R.China.

<sup>b</sup> School of Biomedical Engineering, Southern Medical University, Guangzhou 510515, P.R.China.

\*Corresponding Author.

E-mail address: [cejqqu@scut.edu.cn](mailto:cejqqu@scut.edu.cn) (Jinqing. Qu); [ruiyliu@smu.edu.cn](mailto:ruiyliu@smu.edu.cn) (Ruiyuan. Liu)

---

\*Correspondence to: Jinqing Qu, School of Chemistry and Chemical Engineering, South China University of Technology, Guangzhou 510640, P.R.China, China. Email: [cejqqu@scut.edu.cn](mailto:cejqqu@scut.edu.cn).

## Table of contents

|                                | Page |
|--------------------------------|------|
| Materials and instruments..... | S3   |
| Cell culture.....              | S3   |
| Scheme S1.....                 | S5   |
| Table S1.....                  | S5   |
| Table S2.....                  | S6   |
| Figure S1.....                 | S6   |
| Figure S2.....                 | S7   |
| Figure S3.....                 | S7   |
| Figure S4.....                 | S8   |
| Figure S5.....                 | S8   |
| Figure S6.....                 | S9   |
| Figure S7.....                 | S9   |
| Figure S8.....                 | S10  |
| Figure S9.....                 | S11  |
| Figure S10.....                | S11  |
| Figure S11.....                | S12  |
| Figure S12.....                | S13  |
| Figure S13.....                | S14  |
| Figure S14.....                | S15  |
| Figure S15.....                | S15  |
| Figure S16.....                | S16  |

### ***Materials and instruments***

Unless otherwise stated, all reagents as well as drugs covered in this article were purchased from commercial platforms and used without purification. High-resolution mass spectrometry (HRMS) analyses were measured on a Bruker maxis impact spectrometer; NMR spectra were recorded on a Bruker Advance III HD 600 MHz spectrometer using TMS as an internal standard; absorption spectra were obtained on a Shimadzu UV2600 power spectrometer; fluorescence spectra were recorded with a HITA CHI F7100 fluorescence spectrophotometer; Cell fluorescence spectra were taken with a Nikon Eclipse C1 Plus laser confocal scanning microscope. Fluorescence spectra were recorded on a HITA CHI F7100 fluorescence spectrophotometer; pH measurements were carried out on a Mettler-Toledo Delta 320 pH meter; thin layer chromatography was carried out on silica gel plates, and column chromatography was carried out on silica gel (mesh size 200~300).

### ***Cell culture***

4T1 cells (murine mammary carcinoma cells) were cultured in Dulbecco's Modified Eagle's Medium (DMEM) supplemented with 10% foetal bovine serum (FBS) and 1% antibiotic-antimycotic solution (containing 100 µg/mL penicillin and 100 µg/mL streptomycin, Hyclone brand), maintained at 37°C with 5% CO<sub>2</sub> and 95% air. For cytotoxicity assays, 4T1 cells were seeded into 96-well plates containing 100 µL DMEM medium supplemented with 10% FBS and 1% penicillin/streptomycin per well, and incubated overnight under the aforementioned conditions. The following day, wells were supplemented with varying concentrations of **Mito-NT** (final

concentrations: 0, 1, 2, 5, 10, 20  $\mu$ M) and incubated for a further 24 hours. Following incubation, add 100  $\mu$ L of DMEM/CCK8 mixture (volume ratio 10:1) to each well and incubate for 1 hour. Finally, measure the absorbance of each well's solution at 492 nm using an enzyme-linked immunosorbent assay reader. Cell viability was calculated from the absorbance values using the following formula:

$$Cell\ survival\ rate\ (\%) = \frac{OD_{492}sample - OD_{492}blank}{OD_{492}control - OD_{492}blank} \times 100\%$$

In this context, the  $OD_{492}$  sample value in the formula denotes the  $OD_{492}$  reading of the cell well after incubation with CCK8 following the addition of different concentrations of **Mito-NT**.  $OD_{492}$  blank (OD value of the blank group) represents the  $OD_{492}$  value of wells containing only DMEM/CCK8 mixture (without cells or **Mito-NT**), used to subtract the background absorption of the medium and CCK8 reagent itself;  $OD_{492}$  control (OD value of the control group) represents the  $OD_{492}$  value of the cell well after incubation with CCK8 following the addition of 0  $\mu$ M **Mito-NT** (i.e., containing only cells and medium, without drug treatment), corresponding to a 100% cell survival state. To ensure result reliability, each concentration group and control group must include 10 replicate wells. Calculations shall use the average  $OD_{492}$  value from each replicate well substituted into the formula.

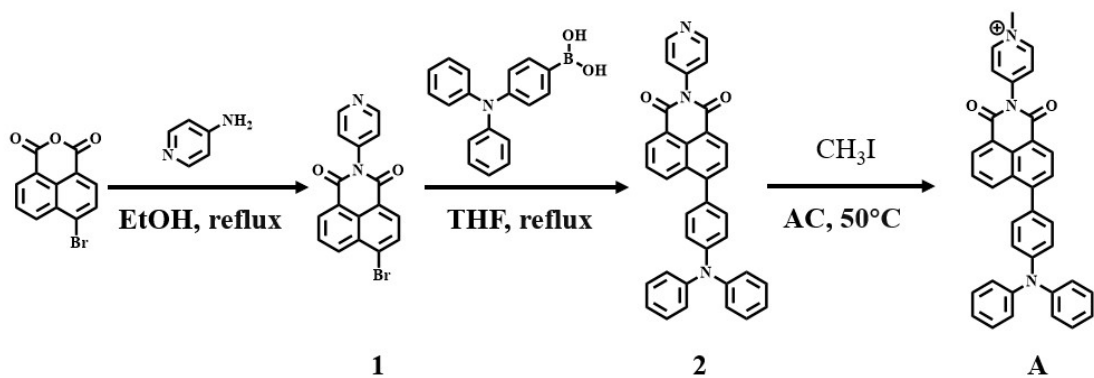

**Scheme S1:** Synthesis process of compound A.

**Table S1:** Polarity parameters of mixed solutions of different proportions of dioxane and EA

| Dioxane (%) | EA (%) | $E_T$ (30) (kcal/mol) |
|-------------|--------|-----------------------|
| 0           | 100    | 38.1                  |
| 10          | 90     | 37.89                 |
| 20          | 80     | 37.68                 |
| 30          | 70     | 37.47                 |
| 40          | 60     | 37.26                 |
| 50          | 50     | 37.05                 |
| 60          | 40     | 36.84                 |
| 70          | 30     | 36.63                 |
| 80          | 20     | 36.42                 |
| 90          | 10     | 36.21                 |
| 99          | 1      | 36.02                 |

**Table S2:** Solvation effects of probe **Mito-NT** in different solvents

| Solvent | Absorption<br>(nm) | Emission<br>(nm) | E <sub>T</sub> (30)<br>(kcal/mol) | Stokes<br>displacement<br>(nm) | Molar<br>absorptivity<br>(L · mol <sup>-1</sup> · cm <sup>-1</sup> ) | Quantum<br>yield<br>(%) |
|---------|--------------------|------------------|-----------------------------------|--------------------------------|----------------------------------------------------------------------|-------------------------|
| Hexane  | 424.5              | 516.0            | 31.0                              | 91.5                           | 2683                                                                 | 72.58                   |
| Toluene | 433.5              | 552.2            | 33.9                              | 118.7                          | 2411                                                                 | 60.23                   |
| Dioxane | 430.5              | 582.2            | 36.0                              | 151.7                          | 4970                                                                 | 29.98                   |
| EA      | 425.0              | 626.6            | 38.1                              | 201.6                          | 3195                                                                 | 10.75                   |
| THF     | 435.5              | 630.6            | 37.4                              | 195.1                          | 3789                                                                 | 9.39                    |
| DCM     | 454.0              | 659.0            | 41.1                              | 205.0                          | 4052                                                                 | 6.19                    |

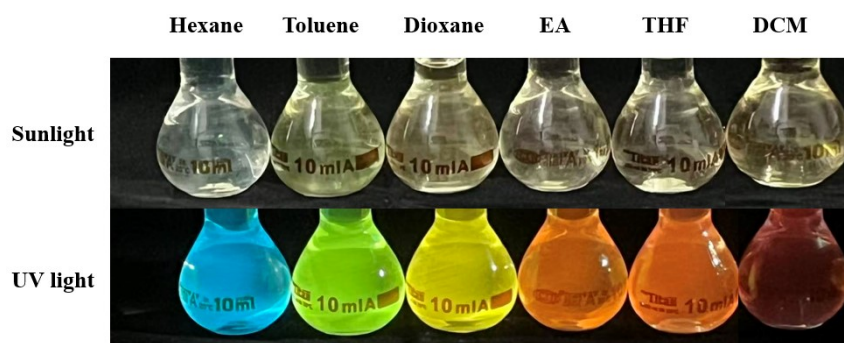**Figure S1:** Photographs of the probe **Mito-NT** (10  $\mu$ M) in different solvents under sunlight and ultraviolet light.

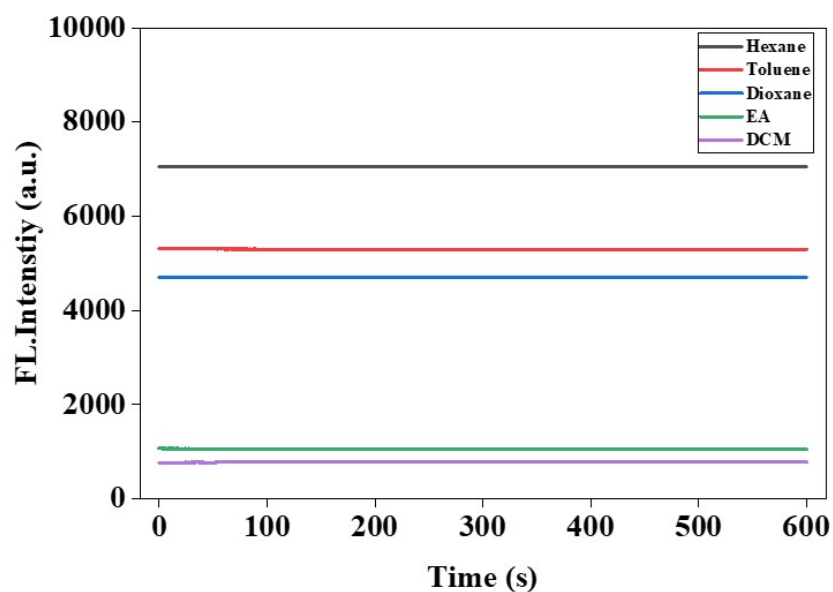

**Figure S2:** Photostability of the **Mito-NT** probe in different solvents (Hexane, Toluene, Dioxane, EA and DCM).

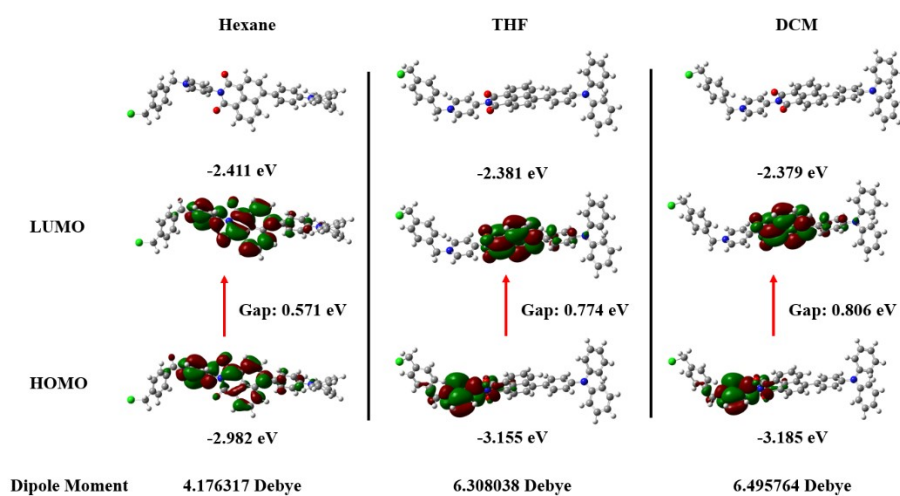

**Figure S3:** The optimized geometry, orbital energies, and dipole moments of the excited state and frontier molecular orbitals for the probe **Mito-NT**.

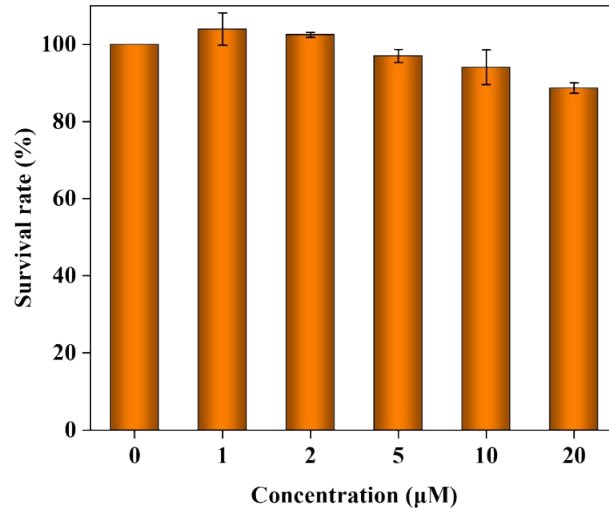

**Figure S4:** Cytotoxicity assays of **Mito-NT** at different concentrations for 4T1 cells.

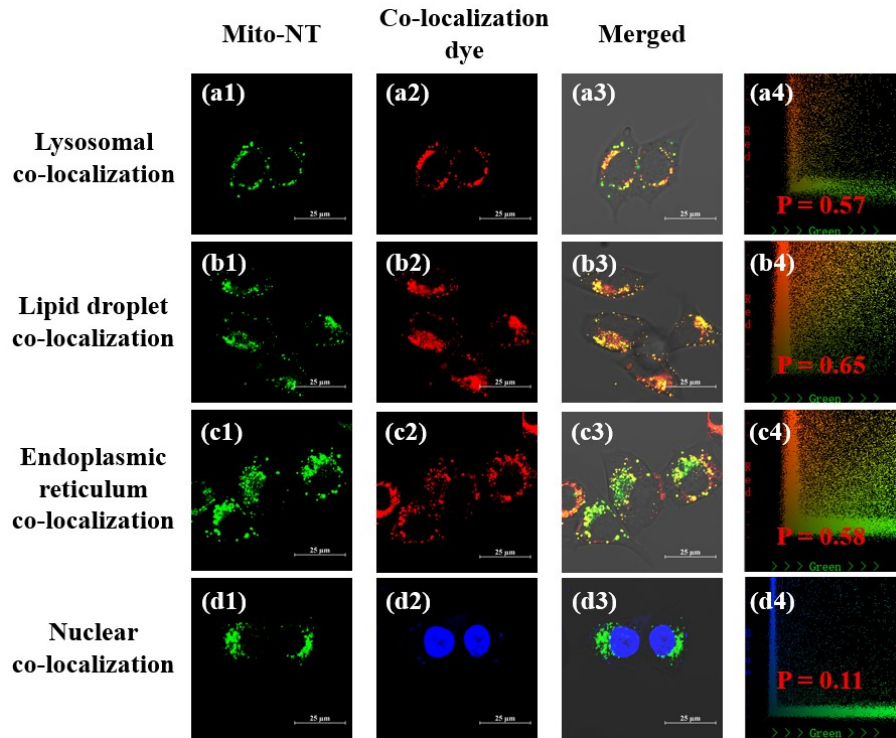

**Figure S5:** Colocalization imaging of the **Mito-NT** probe (10 μM) with organelle-specific dyes in 4T1 cells. Blue channel:  $\lambda_{\text{ex}} = 404$  nm,  $\lambda_{\text{em}} = 430\text{--}475$  nm; Green channel:  $\lambda_{\text{ex}} = 488$  nm,  $\lambda_{\text{em}} = 500\text{--}550$  nm. Red channel:  $\lambda_{\text{ex}} = 561$  nm,  $\lambda_{\text{em}} = 570\text{--}616$  nm. Scale bars: 25 μm.



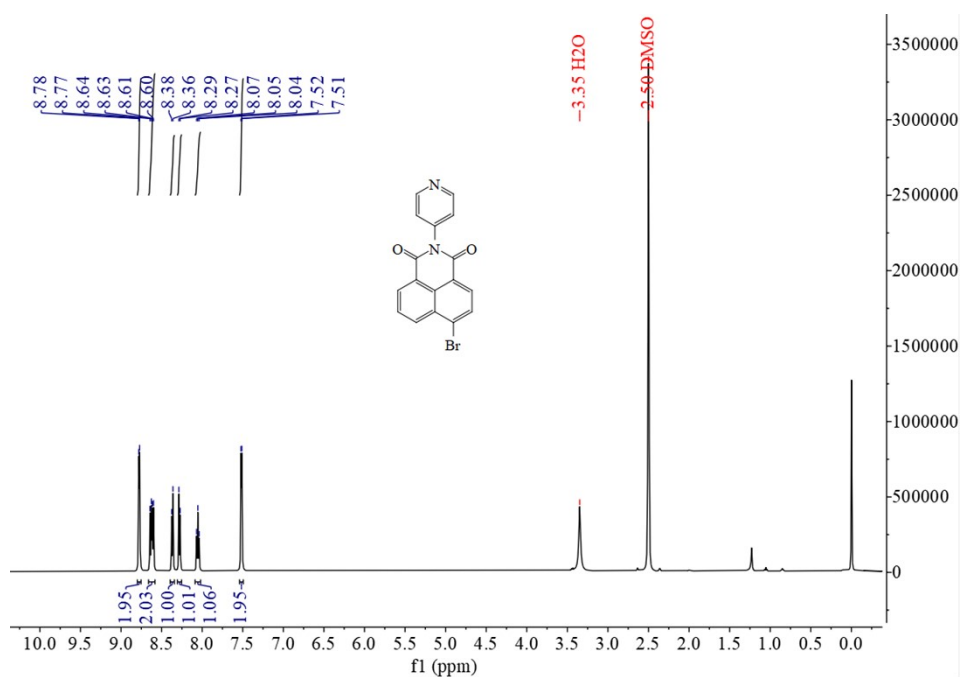

**Figure S6.**  $^1\text{H}$ -NMR ( $\text{DMSO}-d_6$ ) spectrum of Compound 1.

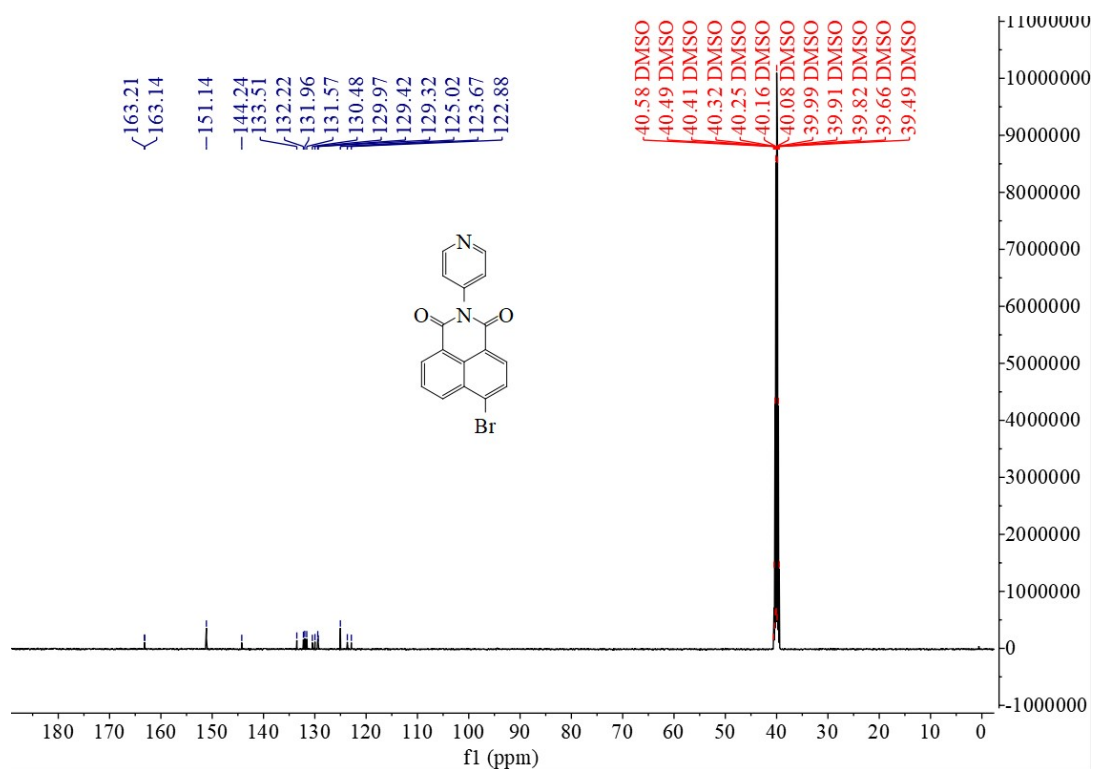

**Figure S7.**  $^{13}\text{C}$ -NMR ( $\text{DMSO}-d_6$ ) spectrum of Compound 1.

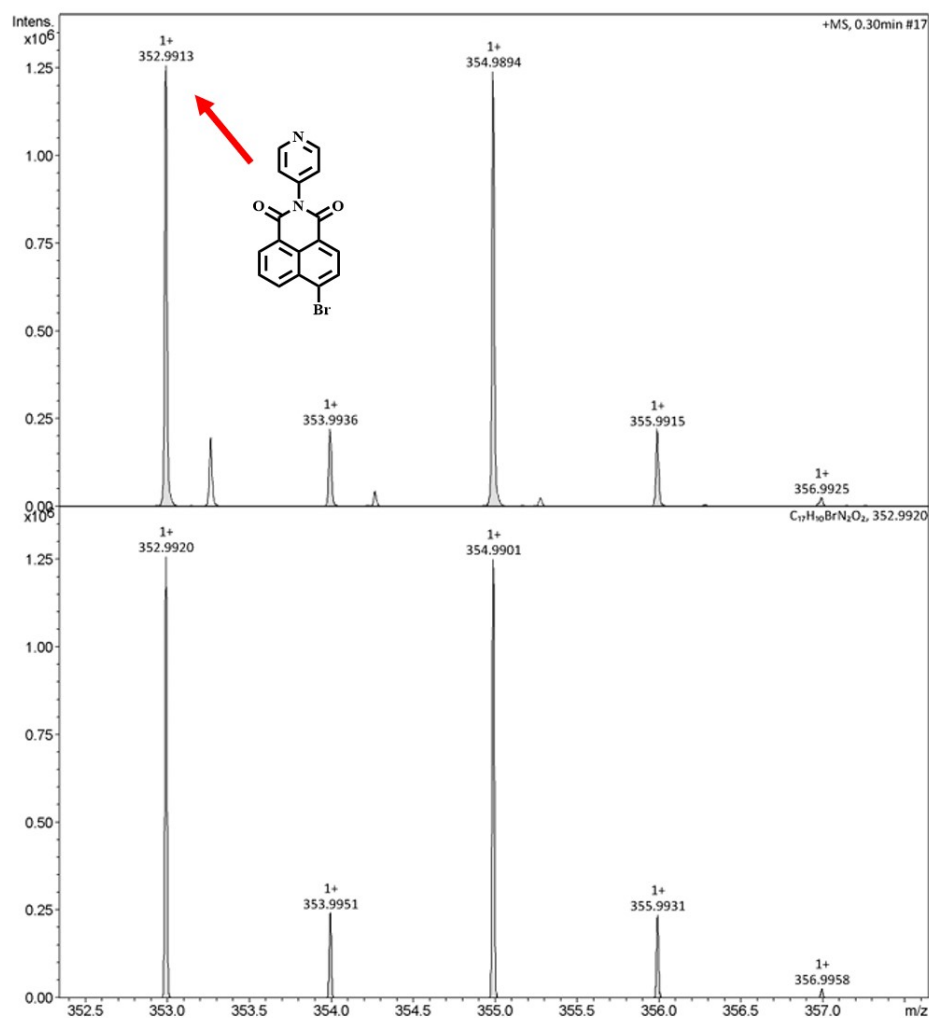

**Figure S8.** HRMS (ESI) spectrum of Compound 1.

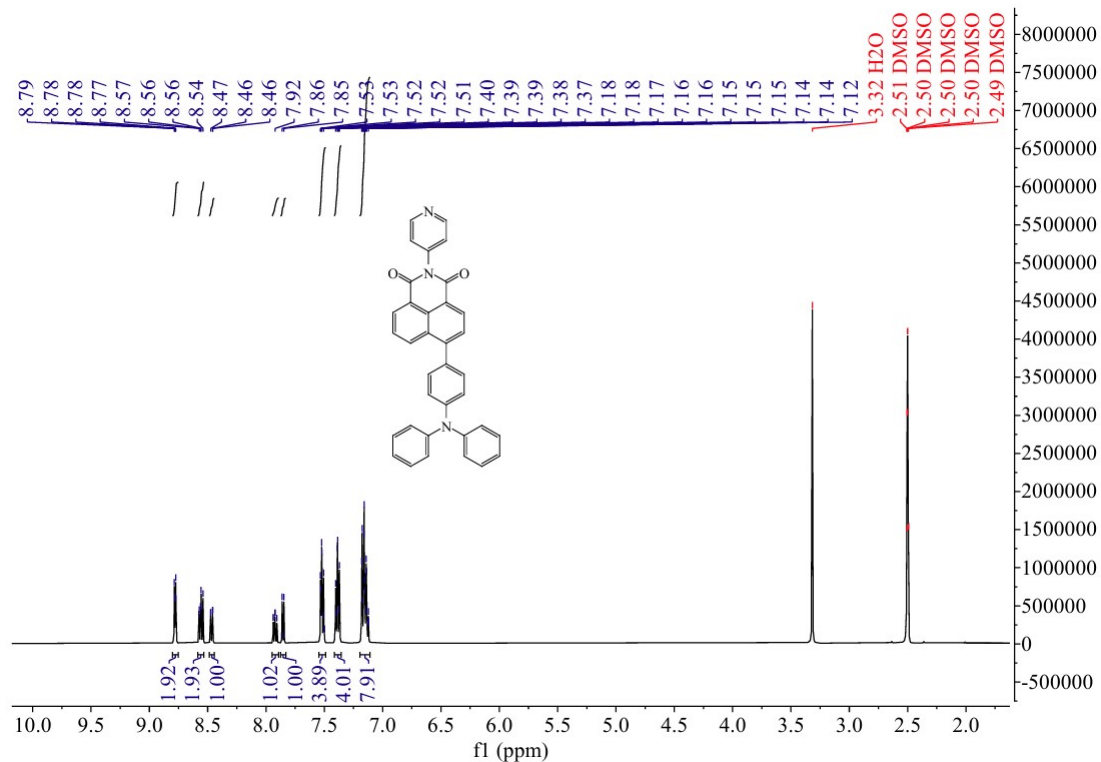

**Figure S9.** <sup>1</sup>H-NMR (DMSO-*d*<sub>6</sub>) spectrum of Compound 2.

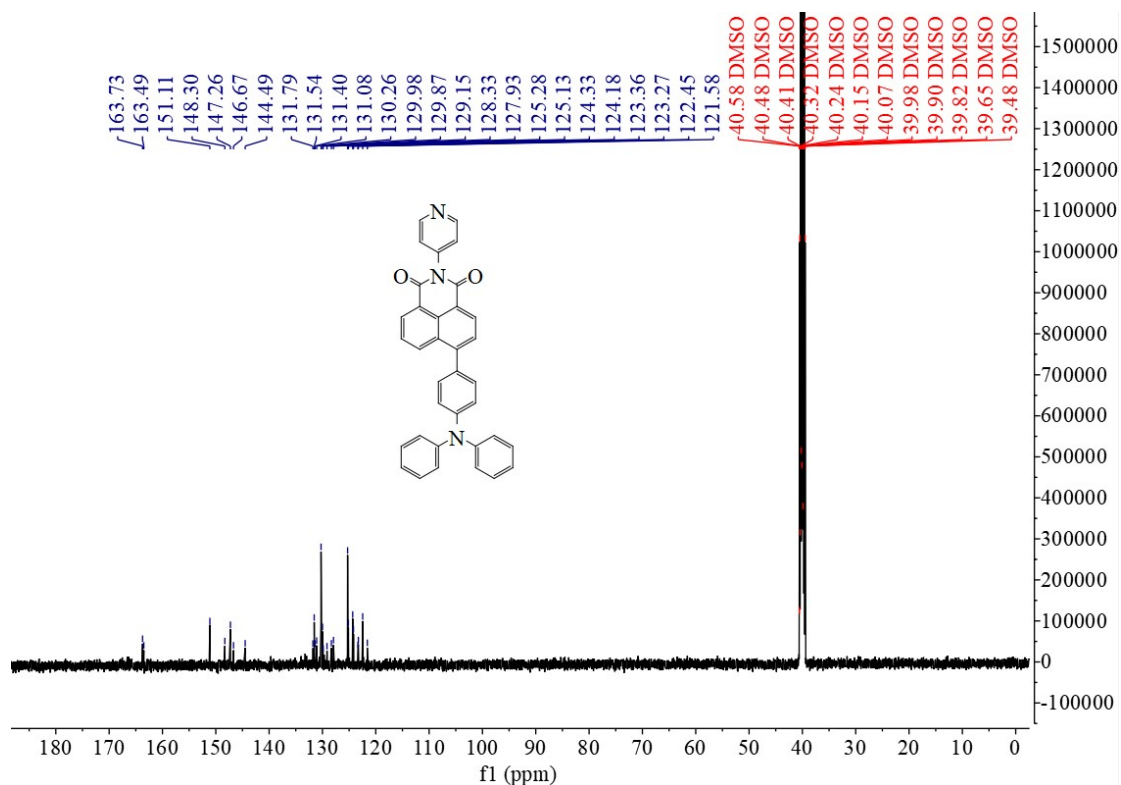

**Figure S10.** <sup>13</sup>C-NMR (DMSO-*d*<sub>6</sub>) spectrum of Compound 2.

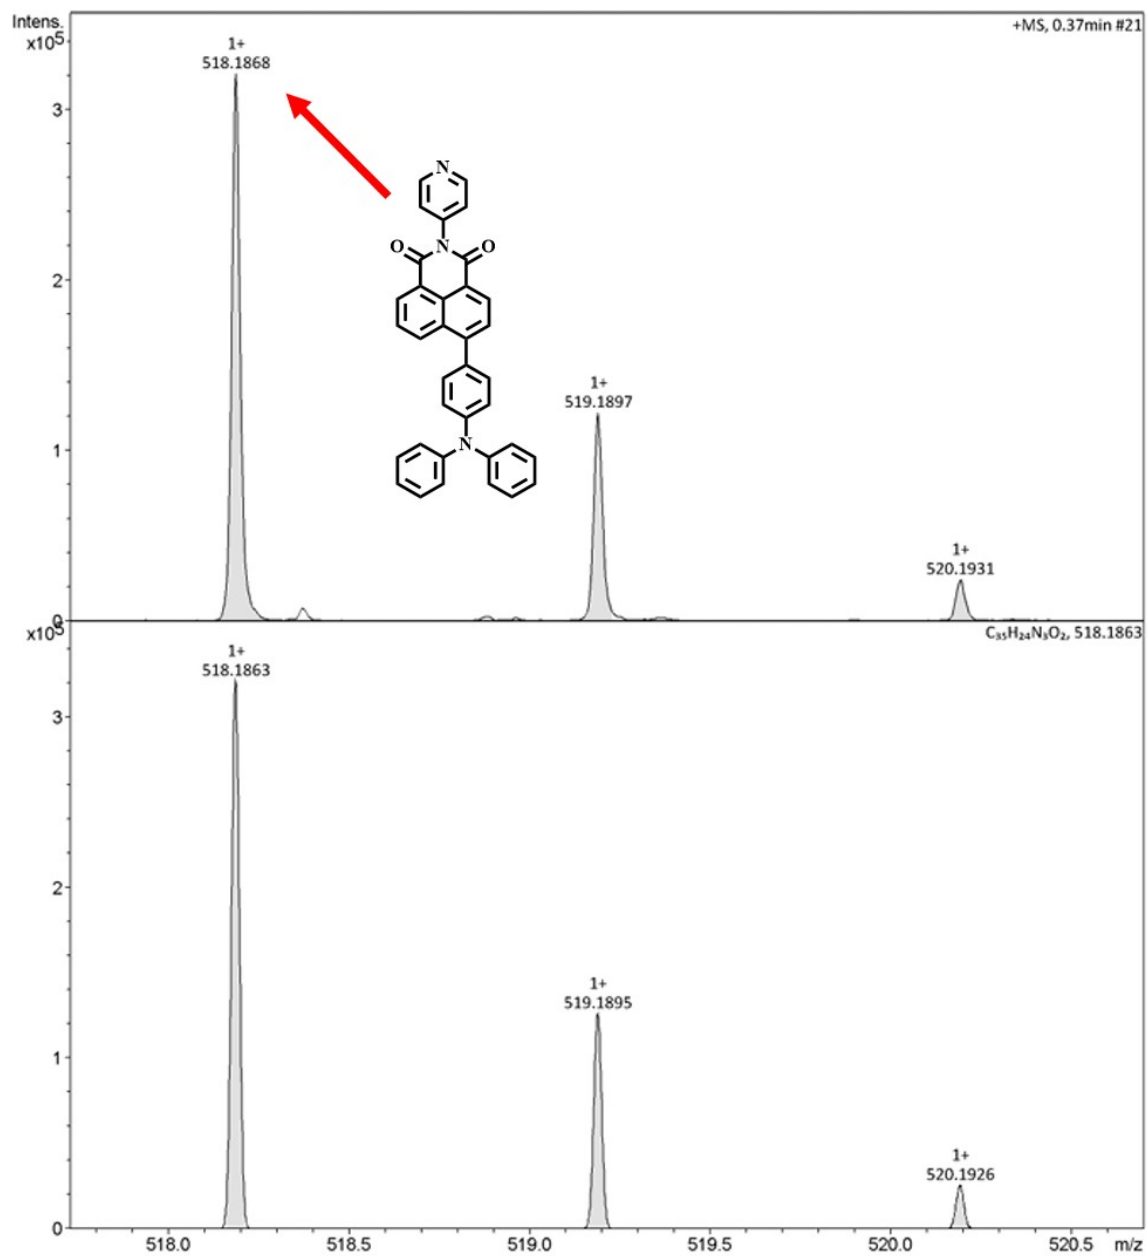

**Figure S11.** HRMS (ESI) spectrum of 2.

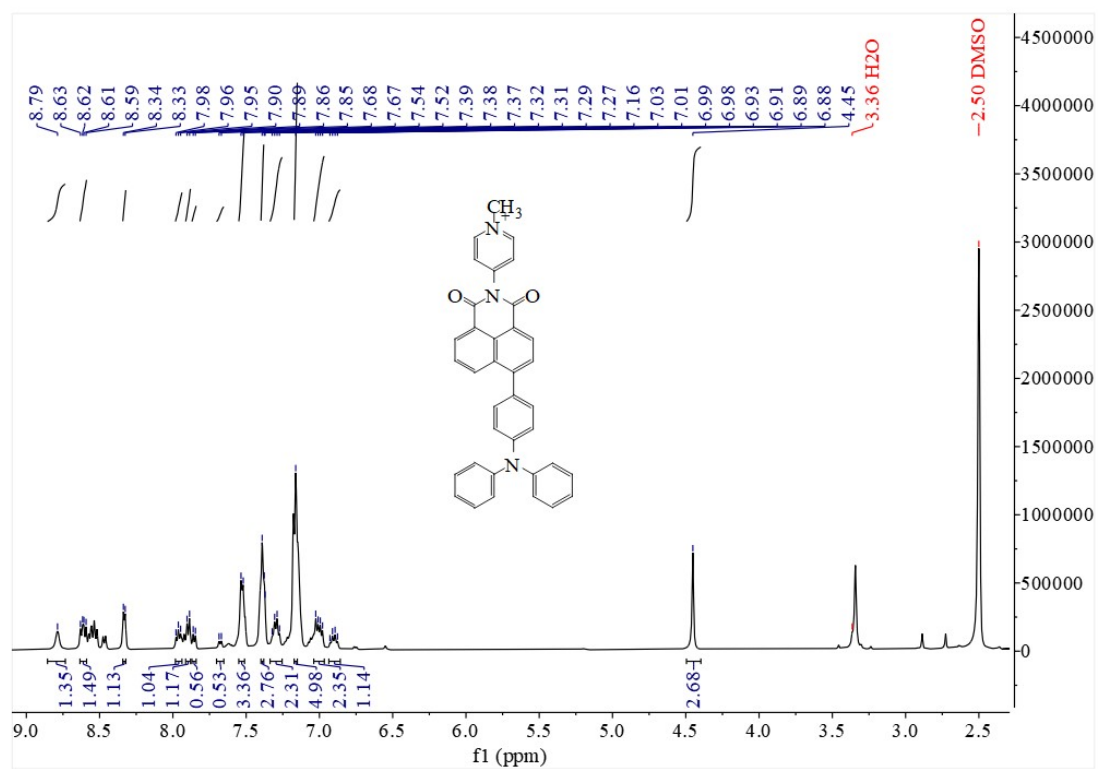

**Figure S12.** <sup>1</sup>H-NMR (DMSO-*d*<sub>6</sub>) spectrum of Compound A.

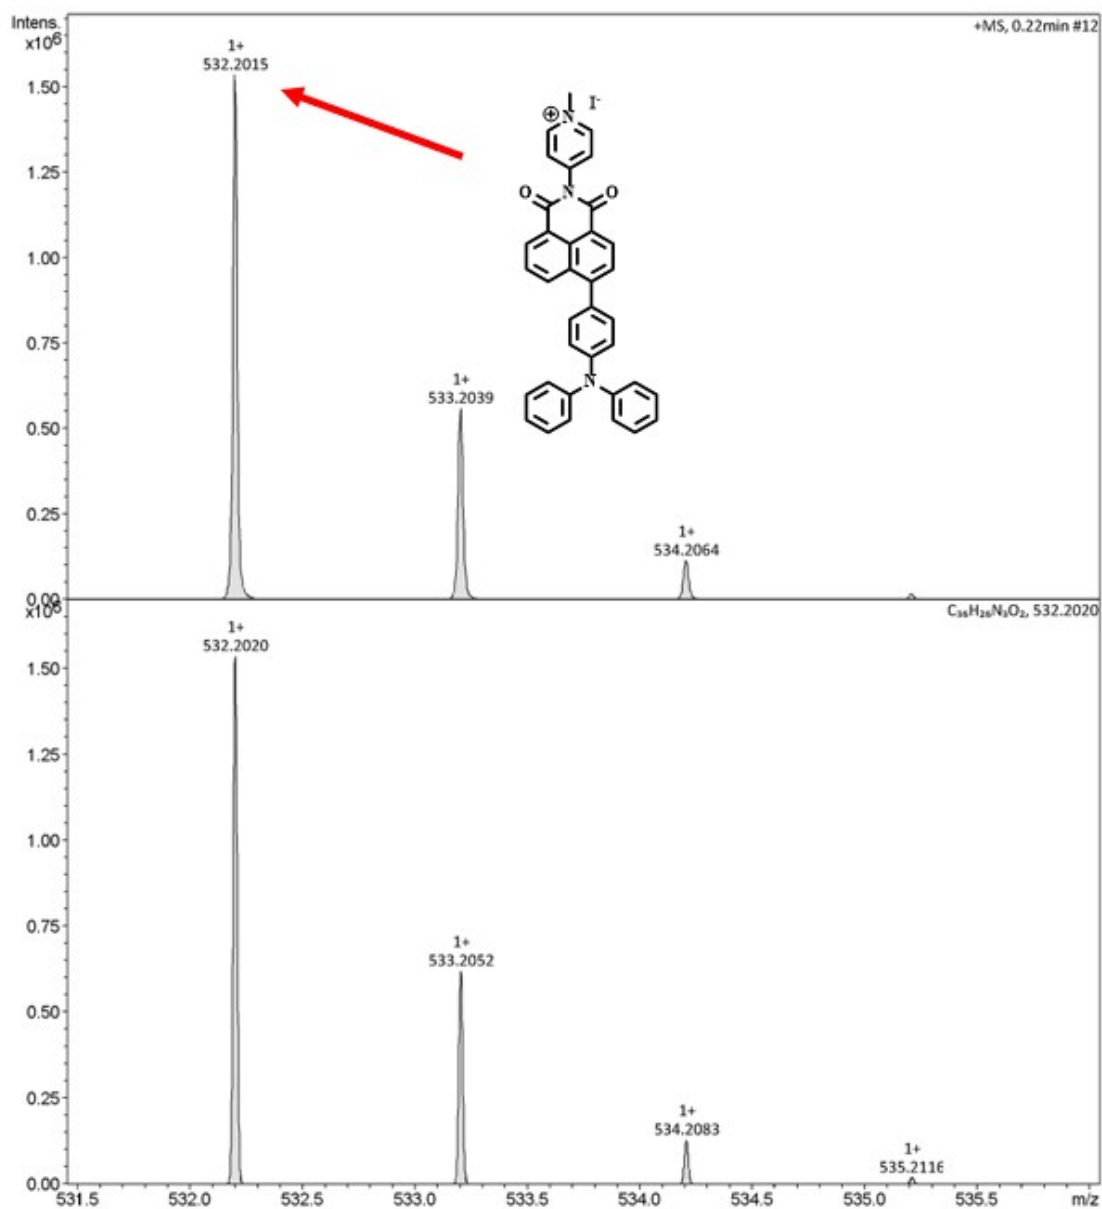

**Figure S13.** HRMS (ESI) spectrum of Compound A.

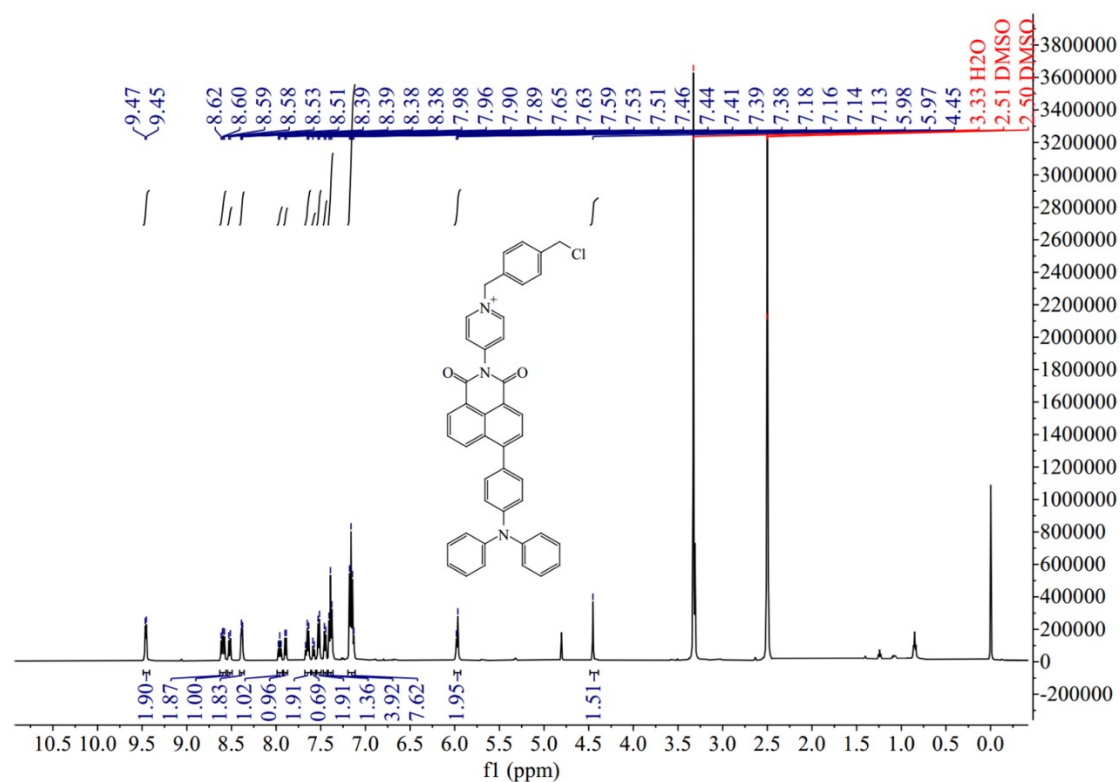

**Figure S14.** <sup>1</sup>H-NMR (DMSO-*d*<sub>6</sub>) spectrum of Compound Mito-NT.

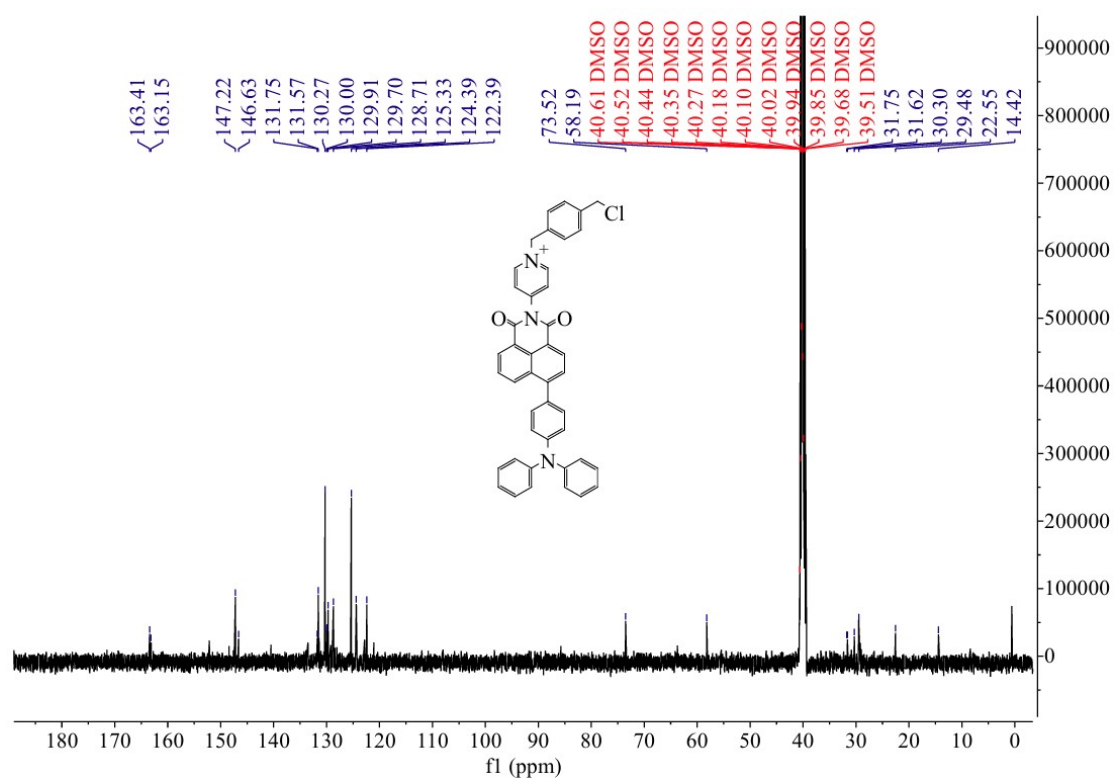

**Figure S15.** <sup>13</sup>C-NMR (DMSO-*d*<sub>6</sub>) spectrum of Compound Mito-NT.

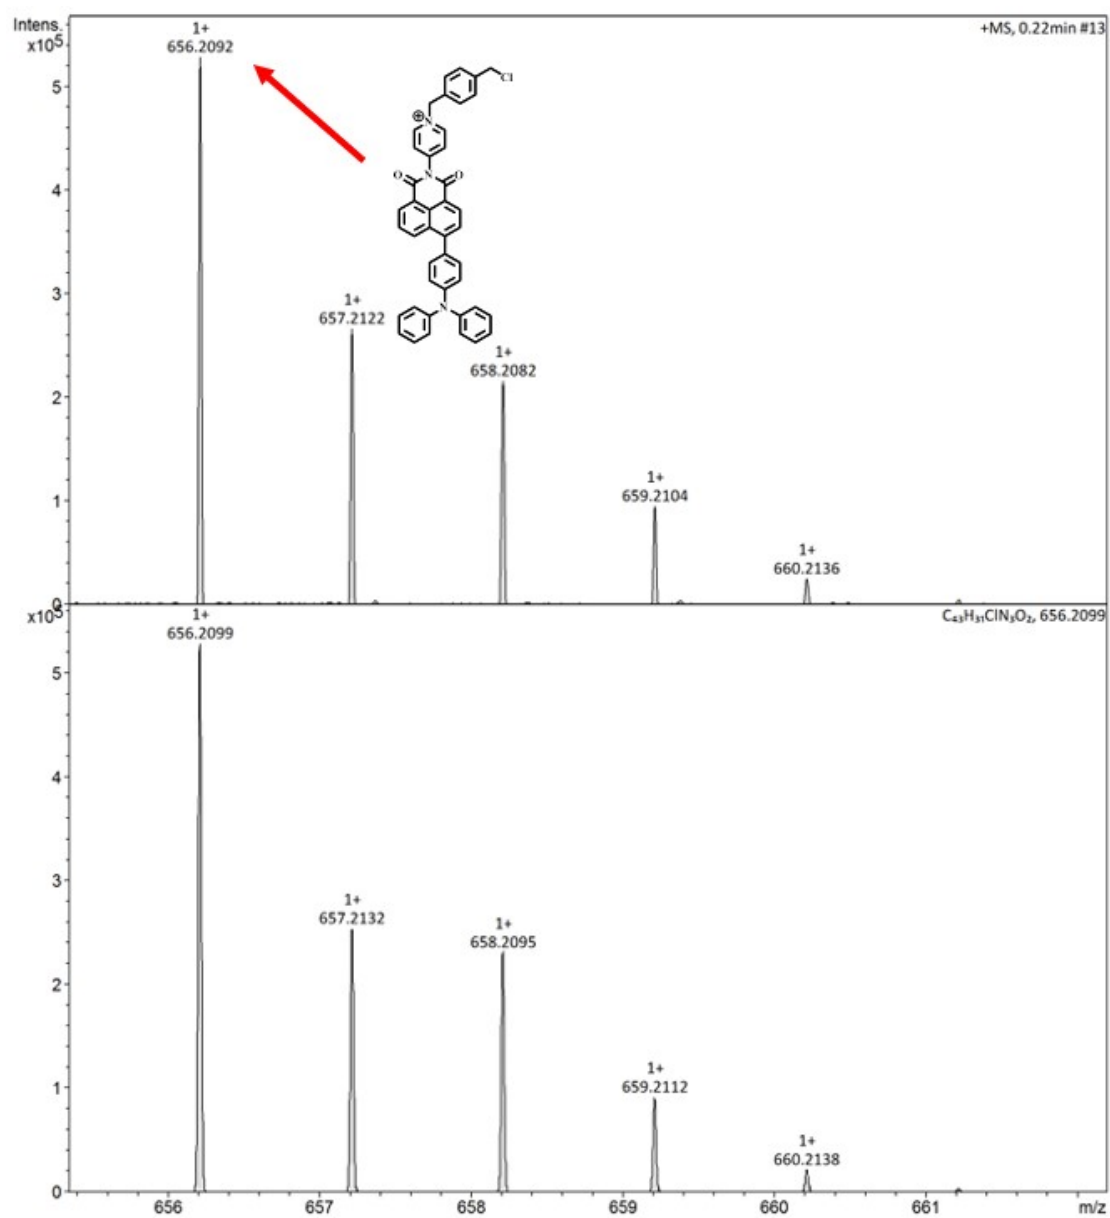

**Figure S16.** HRMS (ESI) spectrum of Mito-NT.
